# Supplementary material for: Associations between Advanced Glycation End Products, Body Composition and Mediterranean Diet Adherence in Kidney Transplant Recipients
Source: MDPI journal article supplement (doi:10.3390/ijerph191711060), 2022-09-04
Supplement: s1 [file s1]

**Table S1.** Univariate linear and logistic regression of AGE in KTRs.

|                             | Univariate logistic regression<br>(severe vs mild to moderate CV risk<br>based on AGE) |            |       | Univariate linear regression with<br>AGE |       |       |
|-----------------------------|----------------------------------------------------------------------------------------|------------|-------|------------------------------------------|-------|-------|
|                             | OR                                                                                     | 95% CI     | P     | Beta                                     | SE    | P     |
| Age                         | 1.09                                                                                   | 1.05-1.14  | 0.000 | 0.033                                    | 0.006 | 0.000 |
| Sex (men)                   | 1.34                                                                                   | 0.53-3.41  | 0.536 | 0.217                                    | 0.200 | 0.282 |
| Transplantation yrs         | 1.07                                                                                   | 0.98-1.16  | 0.140 | 0.011                                    | 0.017 | 0.524 |
| Dialysis type (HD)          | 5.47                                                                                   | 1.86-16.1  | 0.002 | 0.438                                    | 0.220 | 0.050 |
| Dialysis type<br>(PD+HD)    | 5.00                                                                                   | 1.14-21.86 | 0.033 | 0.416                                    | 0.289 | 0.153 |
| Dialysis yrs                | 1.17                                                                                   | 0.98-1.41  | 0.085 | 0.068                                    | 0.025 | 0.007 |
| Smoking status              | 1.1                                                                                    | 0.57-2.14  | 0.778 | -0.071                                   | 0.159 | 0.654 |
| COMORBIDITIES               |                                                                                        |            |       |                                          |       |       |
| AH (yes)                    | 1.56                                                                                   | 0.24-9.91  | 0.640 | 0.445                                    | 0.419 | 0.291 |
| DM (yes)                    | 2.05                                                                                   | 0.61-6.86  | 0.246 | 0.342                                    | 0.231 | 0.143 |
| CVD (yes)                   | 2.15                                                                                   | 0.71-6.56  | 0.177 | 0.648                                    | 0.206 | 0.002 |
| CVA (yes)                   | 1.20                                                                                   | 0.29-4.95  | 0.798 | 0.001                                    | 0.296 | 0.996 |
| eGFR cat (yes)              | 5.09                                                                                   | 1.85-14    | 0.002 | 0.837                                    | 0.197 | 0.000 |
| LABORATORY PARAMETERS       |                                                                                        |            |       |                                          |       |       |
| Alb                         | 0.93                                                                                   | 0.79-1.1   | 0.416 | -0.043                                   | 0.035 | 0.221 |
| Ca                          | 0.15                                                                                   | 0.01-2.43  | 0.180 | -0.355                                   | 0.483 | 0.464 |
| CRP                         | 1.11                                                                                   | 0.96-1.28  | 0.146 | 0.069                                    | 0.021 | 0.002 |
| E                           | 0.99                                                                                   | 0.5-1.97   | 0.987 | 0.034                                    | 0.146 | 0.815 |
| GUP                         | 1.01                                                                                   | 0.67-1.5   | 0.979 | 0.014                                    | 0.086 | 0.867 |
| Hb                          | 1.00                                                                                   | 0.97-1.03  | 0.991 | 0.000                                    | 0.006 | 0.941 |
| K                           | 1.21                                                                                   | 0.43-3.4   | 0.721 | -0.003                                   | 0.220 | 0.989 |
| Cholesterol                 | 1.00                                                                                   | 0.61-1.62  | 0.992 | -0.161                                   | 0.105 | 0.131 |
| Creatinin                   | 1.01                                                                                   | 1-1.02     | 0.103 | 0.003                                    | 0.002 | 0.099 |
| LDL                         | 1.13                                                                                   | 0.65-1.95  | 0.667 | -0.112                                   | 0.117 | 0.344 |
| MCV                         | 1.01                                                                                   | 0.94-1.1   | 0.747 | 0.006                                    | 0.017 | 0.724 |
| Na                          | 1.10                                                                                   | 0.9-1.34   | 0.351 | 0.005                                    | 0.043 | 0.910 |
| P                           | 0.47                                                                                   | 0.05-4.41  | 0.505 | -0.780                                   | 0.484 | 0.111 |
| Tgl                         | 0.73                                                                                   | 0.44-1.19  | 0.207 | -0.085                                   | 0.108 | 0.430 |
| Urate                       | 1.00                                                                                   | 1-1.01     | 0.385 | 0.003                                    | 0.001 | 0.023 |
| Urea                        | 1.20                                                                                   | 1.04-1.38  | 0.010 | 0.062                                    | 0.020 | 0.003 |
| eGF                         | 0.97                                                                                   | 0.94-0.99  | 0.006 | -0.015                                   | 0.004 | 0.001 |
| ANTHROPOMETRIC PARAMETERS   |                                                                                        |            |       |                                          |       |       |
| Height                      | 0.99                                                                                   | 0.94-1.04  | 0.673 | -0.008                                   | 0.010 | 0.420 |
| Weight                      | 0.98                                                                                   | 0.95-1.01  | 0.255 | -0.011                                   | 0.006 | 0.084 |
| BMI                         | 0.93                                                                                   | 0.83-1.05  | 0.235 | -0.041                                   | 0.025 | 0.103 |
| Overweight                  | 1.45                                                                                   | 0.47-4.5   | 0.521 | -0.042                                   | 0.230 | 0.854 |
| Obese                       | 0.40                                                                                   | 0.11-1.44  | 0.160 | -0.346                                   | 0.288 | 0.233 |
| UpperArm circ.              | 1.01                                                                                   | 0.95-1.07  | 0.729 | -0.007                                   | 0.008 | 0.427 |
| Waist circ.                 | 1.00                                                                                   | 0.96-1.04  | 0.849 | -0.005                                   | 0.007 | 0.504 |
| WHtR                        | 1.51                                                                                   | 0-2935.04  | 0.915 | -0.274                                   | 1.268 | 0.829 |
| BODY COMPOSITION PARAMETERS |                                                                                        |            |       |                                          |       |       |

|                           |      |           |       |        |       |       |
|---------------------------|------|-----------|-------|--------|-------|-------|
| Fat mass (kg)             | 0.95 | 0.89-1    | 0.059 | -0.020 | 0.012 | 0.086 |
| Fat mass (%)              | 0.95 | 0.9-1.01  | 0.089 | -0.018 | 0.012 | 0.135 |
| Fat free mass (kg)        | 1.00 | 0.96-1.04 | 1.000 | -0.003 | 0.009 | 0.715 |
| Visceral fat              | 1.09 | 0.95-1.24 | 0.204 | 0.030  | 0.027 | 0.286 |
| Metabolic age             | 1.04 | 1-1.08    | 0.040 | 0.013  | 0.008 | 0.112 |
| Muscle mass (kg)          | 1.00 | 0.96-1.04 | 0.998 | -0.003 | 0.009 | 0.715 |
| Skeletal muscle mass (kg) | 1.00 | 0.94-1.06 | 0.908 | -0.004 | 0.013 | 0.747 |
| Skeletal muscle mass (%)  | 1.06 | 0.97-1.14 | 0.182 | 0.019  | 0.016 | 0.257 |
| Phase angle               | 0.50 | 0.26-0.97 | 0.041 | -0.290 | 0.134 | 0.034 |
| Trunk visceral fat        | 0.90 | 0.82-0.99 | 0.035 | -0.059 | 0.019 | 0.003 |

#### MEDITERRANEAN DIET

|                  |      |            |       |        |       |       |
|------------------|------|------------|-------|--------|-------|-------|
| MDSS             | 1.00 | 0.88-1.14  | 0.999 | 0.005  | 0.028 | 0.849 |
| MDSS cat (yes)   | 1.88 | 0.37-9.55  | 0.445 | 0.285  | 0.306 | 0.355 |
| Fruits (yes)     | 1.24 | 0.46-3.34  | 0.666 | 0.180  | 0.208 | 0.391 |
| Vegetables (yes) | 1.55 | 0.45-5.32  | 0.482 | 0.090  | 0.248 | 0.718 |
| Cereals (yes)    | 0.43 | 0.17-1.1   | 0.079 | -0.196 | 0.198 | 0.324 |
| Potato (yes)     | 0.58 | 0.17-1.98  | 0.389 | -0.424 | 0.238 | 0.079 |
| Olive oil (yes)  | 0.70 | 0.26-1.89  | 0.486 | -0.106 | 0.217 | 0.627 |
| Nuts (yes)       | 2.75 | 0.56-13.41 | 0.211 | 0.655  | 0.266 | 0.016 |
| Dairy (yes)      | 1.42 | 0.54-3.74  | 0.473 | 0.083  | 0.211 | 0.693 |
| Beans (yes)      | 0.70 | 0.27-1.84  | 0.473 | 0.082  | 0.211 | 0.700 |
| Eggs (yes)       | 0.70 | 0.27-1.84  | 0.473 | -0.052 | 0.211 | 0.808 |
| Fish (yes)       | 0.94 | 0.37-2.38  | 0.888 | -0.115 | 0.201 | 0.571 |
| White meat (yes) | 0.60 | 0.22-1.58  | 0.298 | -0.192 | 0.214 | 0.372 |
| Red meat (yes)   | 2.14 | 0.78-5.86  | 0.139 | -0.048 | 0.203 | 0.816 |
| Sweets (yes)     | 3.68 | 1.39-9.73  | 0.009 | 0.223  | 0.199 | 0.265 |
| Alcohol (yes)    | 1.12 | 0.32-3.97  | 0.858 | -0.007 | 0.267 | 0.979 |
| Fruits freq      | 1.26 | 0.71-2.25  | 0.431 | -0.049 | 0.119 | 0.681 |
| Vegetables freq  | 1.06 | 0.66-1.7   | 0.817 | 0.025  | 0.102 | 0.807 |
| Cereals freq     | 1.03 | 0.61-1.73  | 0.912 | -0.083 | 0.111 | 0.453 |
| Potato freq      | 0.99 | 0.7-1.4    | 0.953 | -0.066 | 0.074 | 0.379 |
| Olive oil freq   | 1.04 | 0.78-1.4   | 0.780 | -0.030 | 0.062 | 0.626 |
| Nuts freq        | 1.09 | 0.85-1.41  | 0.487 | -0.052 | 0.055 | 0.347 |
| Dairy freq       | 0.96 | 0.72-1.28  | 0.769 | -0.046 | 0.063 | 0.467 |
| Beans freq       | 1.26 | 0.88-1.81  | 0.211 | 0.035  | 0.078 | 0.657 |
| Eggs freq        | 1.18 | 0.82-1.68  | 0.370 | -0.006 | 0.077 | 0.937 |
| Fish freq        | 0.97 | 0.65-1.44  | 0.865 | -0.038 | 0.085 | 0.661 |
| White meat freq  | 1.12 | 0.77-1.64  | 0.546 | -0.030 | 0.081 | 0.715 |
| Red meat freq    | 1.28 | 0.89-1.85  | 0.181 | 0.042  | 0.076 | 0.580 |
| Sweets freq      | 1.36 | 1.05-1.75  | 0.018 | 0.025  | 0.050 | 0.616 |
| Alcohol freq     | 1.09 | 0.86-1.38  | 0.478 | 0.013  | 0.052 | 0.804 |

Abbreviations: CV—cardiovascular, PD—peritoneal dialysis, HD—hemodialysis, AGE—advanced glycation end products, AH—arterial hypertension, DM—diabetes mellitus, CVD—cardiovascular disease, CVA—cerebrovascular disease, eGFR—estimated glomerular filtration rate using CKD-EPI (mL/min/1.73m<sup>2</sup>), Alb—serum albumin (g/L), Ca—calcium (mmol/L), CRP—C-reactive protein (mg/L), E—erythrocyte count, GUP—glucose (mmol/L), Hb—haemoglobin (g/L), K—potassium (mmol/l), LDL—low-density lipoprotein cholesterol (mmol/L),

MCV—mean cellular volume (fL), Na—sodium (mmol/L), P—phosphates (mmol/L), Tgl—triglycerides (mmol/L), BMI—body mass index, circ—circumference, WHtR—waist to height ratio, MDSS—Mediterranean Diet Serving Score, freq- frequency ranged from 1 to 7 where 1 denotes “consumed with every meal”, while 7 denotes “consumed rarely or never”, CI—confidence interval, SE—standard error, OR—odds ratio.
